# Supplementary material for: Unified quantitative observation of coexisting volcanic sulfur dioxide and sulfate aerosols using ground-based Fourier transform infrared spectroscopy
Source: Copernicus journal article supplement (doi:10.5194/amt-12-5381-2019), 2019-10-09
Supplement: Supplementary file 1 [file amt-12-5381-2019-supplement.zip]

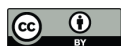

*Supplement of*

**Unified quantitative observation of coexisting volcanic sulfur dioxide and sulfate aerosols using ground-based Fourier transform infrared spectroscopy**

**Pasquale Sellitto et al.**

*Correspondence to:* Pasquale Sellitto ([pasquale.sellitto@lisa.u-pec.fr](mailto:pasquale.sellitto@lisa.u-pec.fr))

- [amt-12-5381-2019-supplement-title-page.pdf](#)
- [AM153044\\_800\\_1200.dat](#)
- [Background\\_800\\_1200.dat](#)

The copyright of individual parts of the supplement might differ from the CC BY 4.0 License.
